# Supplementary material
Source: PubMed Central journal article supplement (PMC8013231)
Supplement: zj4006120000T9.pdf [file zj4006120000T9.pdf]

**On-line Table 1: Findings at dual-energy CT and follow-up imaging**

| Finding by Compartment                            | DECT images |     |        | Interpretation |                       |
|---------------------------------------------------|-------------|-----|--------|----------------|-----------------------|
|                                                   | SE 120 kV   | VNC | Iodine | DECT           | FU NCCT/MRI           |
| Intraparenchymal                                  |             |     |        |                |                       |
| Hemorrhage only ( <i>n</i> = 5)                   | +           | +   | −      | H only         | H                     |
| Iodinated contrast staining only ( <i>n</i> = 33) | +           | −   | +      | Iodine only    | No H                  |
| Mixed H + I, or calcification ( <i>n</i> = 8)     | +           | +   | +      | Mixed          | H + I ( <i>n</i> = 3) |
| Subarachnoid space                                |             |     |        |                |                       |
| Hemorrhage only ( <i>n</i> = 6)                   | +           | +   | −      | H only         | H                     |
| Iodinated contrast staining only ( <i>n</i> = 20) | +           | −   | +      | Iodine only    | No H                  |
| Mixed H + I ( <i>n</i> = 11)                      | +           | +   | +      | Mixed          | H + I                 |
| Extra-axial space                                 |             |     |        |                |                       |
| Hemorrhage only ( <i>n</i> = 8)                   | +           | +   | −      | H only         | H                     |
| Iodinated contrast staining only ( <i>n</i> = 0)  | +           | −   | +      | Iodine only    | No H                  |
| Mixed H + I ( <i>n</i> = 1)                       | +           | +   | +      | Mixed          | H + I                 |
| Intra-arterial                                    |             |     |        |                |                       |
| Hemorrhage only ( <i>n</i> = 10)                  | +           | +   | −      | H only         |                       |
| Iodinated contrast staining ( <i>n</i> = 13)      | +           | −   | +      | Iodine only    |                       |
| Mixed Clot + I ( <i>n</i> = 26)                   | +           | +   | +      | Mixed          | Clot + iodine         |
| Intra-ventricular space                           |             |     |        |                |                       |
| Hemorrhage only ( <i>n</i> = 2)                   | +           | +   | −      | H only         | H                     |
| Iodinated contrast staining only ( <i>n</i> = 4)  | +           | −   | +      | Iodine only    | No H                  |
| Mixed H + I ( <i>n</i> = 1)                       | +           | +   | +      | Mixed          | H + I                 |

**Note:**—H indicates hemorrhage; I, contrast staining; FU, follow-up.

**On-line Table 2: Sensitivity, specificity, and accuracy for the presence of intracranial hemorrhage**

| Compartment            | For the Presence of Hemorrhage |                  |              | TP | FP | TN | FN |
|------------------------|--------------------------------|------------------|--------------|----|----|----|----|
|                        | Sensitivity (%)                | Specificity (%)  | Accuracy (%) |    |    |    |    |
| Intraparenchymal       | 100 (58.9–100)                 | 84.4 (67.2–94.7) | 87.2         | 7  | 5  | 33 | 0  |
| Subarachnoid space     | 100 (80.3–100)                 | 100 (83.0–100)   | 100          | 17 | 0  | 20 | 0  |
| Extra-axial space      | 100 (62.9–100)                 | —                | 100          | 9  | 0  | 0  | 0  |
| Intra-arterial         | 100 (90.2–100)                 | 100 (75.1–100)   | 100          | 36 | 0  | 13 | 0  |
| Intraventricular space | 100 (30.5–100)                 | 100 (40.2–100)   | 100          | 3  | 0  | 4  | 0  |

**Note:**—FN indicates false-negative; FP, false-positive; TN, true negative; TP, true positive.
